# Supplementary material
Source: PubMed Central journal article supplement (PMC10501976)
Supplement: mmc2.pdf [file mmc2.pdf]

**Supplementary Table 1.**

| <b>Target</b> | <b>Host</b> | <b>Isotype/Clone</b> | <b>Conjugate</b> | <b>Application</b> | <b>Dilution</b>              | <b>Cat. No.</b> | <b>Supplier</b>           |
|---------------|-------------|----------------------|------------------|--------------------|------------------------------|-----------------|---------------------------|
| CD11b         | Rat         | IgG2b, κ             | PerCP-Cy5.5      | FC                 | 10 μl/10 <sup>6</sup> cells  | 45-0112-82      | ThermoFisher              |
| CD25          | Rat         | IgG2b, κ             | PE               | FC                 | 5 μl/10 <sup>6</sup> cells   | 553075          | BD Biosciences            |
| CD3           | Hamster     | AH IgG               | PerCP            | FC                 | 0.5 μg/10 <sup>6</sup> cells | 400930          | Biologend                 |
| CD4           | Rat         | IgG2b, κ             | FITC             | FC                 | 5 μl/10 <sup>6</sup> cells   | 553729          | BD Biosciences            |
| CD45          | Rat         | IgG2b, κ             | APC              | FC                 | 5 μl/10 <sup>6</sup> cells   | 559864          | BD Biosciences            |
| CD8           | Rat         | IgG2α, κ             | PE               | FC                 | 5 μl/10 <sup>6</sup> cells   | 553032          | BD Biosciences            |
| F4/80         | Rat WI      | IgG2α, κ             | PE               | FC                 | 5 μl/10 <sup>6</sup> cells   | 565410          | BD Biosciences            |
| FoxP3         | Rat         | IgG <sub>2A</sub>    | eFluor 506       | FC                 | 0.5 μg/10 <sup>6</sup> cells | 69-5773-82      | ThermoFisher              |
| Glucagon      | Rat         | IgG <sub>2A</sub>    | APC              | FC                 | 10 μl/10 <sup>6</sup> cells  | IC1417A         | R&D Systems               |
| IDO           | Rabbit      | D5J4E                | NA               | WB                 | 1:1000                       | 86630           | Cell Signaling Technology |
| Insulin       | Rabbit      | IgG Monoclonal       | PE               | FC                 | 1:50                         | 8508            | Cell Signaling Technology |
| Insulin       | Rabbit      | IgG Polyclonal       | NA               | IHC-F              | 1:3000                       | 20056           | ImmunoStar                |
| PD-L1 (CD274) | Rat         | IgG2b, κ             | FITC             | FC                 | 5 μl/10 <sup>6</sup> cells   | 568303          | BD Biosciences            |
